# Supplementary material
Source: HighWire-hosted journal article supplement (https://gh.bmj.com/content/3/2/e000779)
Supplement: inline-supplementary-material-1 [file inline-supplementary-material-1.pdf]

**Supplementary Material 1. Missingness in data on number of ANC visits and timing of first ANC visit (weighted percentages shown)**

| Country   | Year of survey | Sample of women with live birth in recall | % with no ANC for most recent birth | % of women with ANC with missing data on |                      | % of women with ANC with missing data on visits or timing | Final analysis sample |
|-----------|----------------|-------------------------------------------|-------------------------------------|------------------------------------------|----------------------|-----------------------------------------------------------|-----------------------|
|           |                |                                           |                                     | Number of ANC visits                     | Timing of 1st visits |                                                           |                       |
| DRC       | 2013-14        | 9,660                                     | 9.92%                               | 0.61%                                    | 0.32%                | 0.79%                                                     | 8,354                 |
| Nigeria   | 2013           | 16,721                                    | 33.83%                              | 2.59%                                    | 0.63%                | 2.59%                                                     | 10,753                |
| Rwanda    | 2015           | 4,517                                     | 0.78%                               | 0.00%                                    | 0.09%                | 0.08%                                                     | 4,477                 |
| Zambia    | 2013-14        | 7,267                                     | 1.43%                               | 0.80%                                    | 0.31%                | 1.02%                                                     | 7,072                 |
| Egypt     | 2014           | 8,842                                     | 8.77%                               | 0.95%                                    | 0.30%                | 1.18%                                                     | 7,955                 |
| Jordan    | 2012           | 5,189                                     | 0.89%                               | 0.20%                                    | 0.00%                | 0.20%                                                     | 5,145                 |
| Indonesia | 2012           | 10,394                                    | 3.00%                               | 0.86%                                    | 0.46%                | 1.03%                                                     | 9,771                 |
| Nepal     | 2011           | 2,857                                     | 14.14%                              | 0.00%                                    | 0.00%                | 0.00%                                                     | 2,468                 |
| Colombia  | 2010           | 9,879                                     | 3.27%                               | 1.06%                                    | 0.15%                | 1.11%                                                     | 9,175                 |
| Haiti     | 2012           | 4,124                                     | 9.79%                               | 0.71%                                    | 0.07%                | 0.76%                                                     | 3,700                 |

## Supplementary Material 2. Care components available in each country mapped onto WHO recommendations

| Component group                 | Care component                                | Type of content based on WHO guidance <sup>7</sup> | Rationale                                                                                                                          | Question(s) asked on questionnaire and notes<br>English version of question shown from questionnaires published in English, in other languages if none available in English across included countries. If question wording varied by country, all variations shown.                                                                                                                                                                                                                                                                                                                                                                                                                                                                                                                                                                                                                                                                                                                                                                                                     |
|---------------------------------|-----------------------------------------------|----------------------------------------------------|------------------------------------------------------------------------------------------------------------------------------------|-------------------------------------------------------------------------------------------------------------------------------------------------------------------------------------------------------------------------------------------------------------------------------------------------------------------------------------------------------------------------------------------------------------------------------------------------------------------------------------------------------------------------------------------------------------------------------------------------------------------------------------------------------------------------------------------------------------------------------------------------------------------------------------------------------------------------------------------------------------------------------------------------------------------------------------------------------------------------------------------------------------------------------------------------------------------------|
| Available - routinely collected | Blood pressure measured                       | Assessment                                         | Good clinical practice for routine ANC to detect hypertension                                                                      | As part of your antenatal care during this pregnancy, were any of the following done at least once:<br>Was your blood pressure measured?                                                                                                                                                                                                                                                                                                                                                                                                                                                                                                                                                                                                                                                                                                                                                                                                                                                                                                                                |
|                                 | Urine test                                    | Assessment                                         | Proxy for interventions specified in guidelines (detection of proteinuria and/or asymptomatic bacteriuria screening and treatment) | As part of your antenatal care during this pregnancy, were any of the following done at least once:<br>Did you give a urine sample?                                                                                                                                                                                                                                                                                                                                                                                                                                                                                                                                                                                                                                                                                                                                                                                                                                                                                                                                     |
|                                 | Blood test                                    | Assessment                                         | Proxies for interventions specified in guidelines (blood being taken as a proxy for anaemia and/or HIV testing)                    | As part of your antenatal care during this pregnancy, were any of the following done at least once:<br>Did you give a blood sample?                                                                                                                                                                                                                                                                                                                                                                                                                                                                                                                                                                                                                                                                                                                                                                                                                                                                                                                                     |
|                                 | Protection against tetanus toxoid             | Prevention                                         | Maternal immunization to prevent maternal and neonatal tetanus                                                                     | During this pregnancy, were you given an injection in the arm to prevent the baby from getting tetanus, that is, convulsions after birth?<br>During this pregnancy, how many times did you get a tetanus injection?<br>At any time before this pregnancy, did you receive any tetanus injections, either to protect yourself or another baby?<br>Before this pregnancy, how many times did you receive a tetanus injection?<br>How many years ago did you receive the last tetanus injection?<br><br>Coverage defined as:<br>2+ injections during the pregnancy of their last birth, or<br>2+ injections (the last within 3 years of the last live birth), or<br>3+ injections (the last within 5 years of the last birth), or<br>4+ injections (the last within 10 years of the last live birth), or<br>5+ injections at any time prior to the last birth.<br>In Colombia, TT during previous pregnancies not asked: decided conservatively to define TT coverage as 2+ injections in current pregnancy (that is what the DHS report seems to infer is good coverage). |
|                                 | Iron supplementation                          | Prevention/treatment                               | Nutritional interventions to prevent/treat anaemia                                                                                 | During this pregnancy, were you given or did you buy any iron tablets or iron syrup?                                                                                                                                                                                                                                                                                                                                                                                                                                                                                                                                                                                                                                                                                                                                                                                                                                                                                                                                                                                    |
|                                 | Counselling on complications                  | Information                                        | Health promotion intervention to promote appropriate care seeking                                                                  | During (any of) your antenatal care visit(s), were you told about things to look out for that might suggest problems with the pregnancy?                                                                                                                                                                                                                                                                                                                                                                                                                                                                                                                                                                                                                                                                                                                                                                                                                                                                                                                                |
| Available country-specific      | Maternal weight                               | Assessment                                         | Good clinical practice for routine ANC to assess body mass index (BMI) and detect excessive or low weight gain                     | Colombia, Haiti, Jordan, Zambia, DRC, Egypt, Indonesia<br><br>As part of your antenatal care during this pregnancy, were any of the following done at least once:<br>Were you weighed?                                                                                                                                                                                                                                                                                                                                                                                                                                                                                                                                                                                                                                                                                                                                                                                                                                                                                  |
|                                 | Maternal height                               | Assessment                                         | Good clinical practice for routine ANC to assess BMI                                                                               | DRC, Indonesia:<br><br>As part of your antenatal care during this pregnancy, were any of the following done at least once:<br>Was your height measured?                                                                                                                                                                                                                                                                                                                                                                                                                                                                                                                                                                                                                                                                                                                                                                                                                                                                                                                 |
|                                 | Intermittent preventive treatment for malaria | Treatment                                          | Recommended for endemic areas for preventative treatment of malaria                                                                | Zambia, DRC, Nigeria, Rwanda:<br><br>During this pregnancy, did you take any drugs to keep you from getting malaria? (or During this pregnancy, did you take any antimalarial drugs?)                                                                                                                                                                                                                                                                                                                                                                                                                                                                                                                                                                                                                                                                                                                                                                                                                                                                                   |
|                                 | Intestinal parasite                           | Treatment                                          | Recommended for endemic areas to for                                                                                               | Haiti, Nepal, Nigeria, Zambia, Rwanda:                                                                                                                                                                                                                                                                                                                                                                                                                                                                                                                                                                                                                                                                                                                                                                                                                                                                                                                                                                                                                                  |

|                                                   |                          |                                                                                                                                      |                                                                                                                                                                                                                                                                                         |
|---------------------------------------------------|--------------------------|--------------------------------------------------------------------------------------------------------------------------------------|-----------------------------------------------------------------------------------------------------------------------------------------------------------------------------------------------------------------------------------------------------------------------------------------|
| treatment                                         |                          | preventative treatment of helminths                                                                                                  | During this pregnancy, did you take any drug for intestinal worms?                                                                                                                                                                                                                      |
| Foetal heartrate measured                         | Assessment               | Good clinical practice as part of ANC to assess fetal well-being                                                                     | Haiti: Est-ce qu'au cours des visites prénatales durant cette grossesse, les examens suivants ont été effectués au moins une fois: A-t-on ausculté le foetus?<br><br>Colombia: En alguno de sus controles, le hicieron algo de lo siguiente: ¿Escuchó los latidos del corazón del bebé? |
| Fundal height measured                            | Assessment               | Recommended for fetal assessment to assess fetal well-being                                                                          | Haiti: Est-ce qu'au cours des visites prénatales durant cette grossesse, les examens suivants ont été effectués au moins une fois: A-t-on mesuré la hauteur utérine?<br><br>Colombia: ¿Le midieron la altura uterina ?                                                                  |
| Calcium supplement                                | Prevention               | Nutritional intervention recommended in populations with low dietary calcium intake to prevent pre-eclampsia                         | Colombia: ¿La institución a la que se encuentra (encontraba) afiliada le entregó el suplemento de calcio?                                                                                                                                                                               |
| Folic acid supplement                             | Prevention               | Nutritional intervention recommended for all pregnant women to prevent neural tube defects in the fetus                              | Colombia: ¿La institución a la que se encuentra (encontraba) afiliada le entregó el ácido fólico?                                                                                                                                                                                       |
| HIV counselling and testing                       | Information & Assessment | Recommended for all pregnant women to prevent mother to child transmission and initiate treatment for the woman based on the results | Zambia: During this pregnancy were you offered counselling and testing for the virus that causes AIDS?                                                                                                                                                                                  |
| Given postnatal information                       | Information              | Health promotion intervention to promote appropriate care seeking                                                                    | Jordan: During (any of) your antenatal care visit(s), were you told about having postnatal care visits one week and 30 days after delivery?                                                                                                                                             |
| Postnatal complication counselling                | Information              | Health promotion intervention to promote appropriate care seeking                                                                    | Jordan: During (any of) your antenatal care visit(s), were you told about the signs of complications during the postnatal period?                                                                                                                                                       |
| Advised to deliver with a skilled birth attendant | Information              | Health promotion intervention to promote appropriate care seeking                                                                    | Nepal: During (any of) your antenatal care visit(s), were you advised to use a skilled birth attendant?<br><br>Indonesia: During your pregnancy with (NAME), did you discuss with anyone about: Who is going to assist the delivery?                                                    |
| Delivery location info                            | Information              | Health promotion intervention to promote appropriate care seeking                                                                    | Indonesia: During your pregnancy with (NAME), did you discuss with anyone about: Where you plan to deliver?<br><br>Zambia: Did the birth preparedness plan include a discussion about: Where you will deliver the baby?                                                                 |
| Transport to delivery                             | Information              | Health promotion intervention to promote appropriate care seeking                                                                    | Indonesia: During your pregnancy with (NAME), did you discuss with anyone about: Transportation to the place of delivery?                                                                                                                                                               |
| Delivery payment                                  | Information              | Health promotion intervention to promote appropriate care seeking                                                                    | Indonesia: During your pregnancy with (NAME), did you discuss with anyone about: Payment for the delivery?                                                                                                                                                                              |
| Blood donor prepared                              | Information              | Health promotion intervention to reduce delay is treatment if needed                                                                 | Indonesia: During your pregnancy with (NAME), did you discuss with anyone about: Identifying a possible blood donor?                                                                                                                                                                    |
| Birth preparedness                                | Information              | Health promotion intervention to promote appropriate care seeking                                                                    | Zambia: Did you discuss a birth preparedness plan with a health provider?                                                                                                                                                                                                               |
| Plan complications                                | Information              | Health promotion intervention to promote appropriate care seeking                                                                    | Zambia: Did the birth preparedness plan include a discussion about: What you will do if a complication arises?                                                                                                                                                                          |
| Birth companion                                   | Information              | Health promotion intervention to ensure a supportive environment and reduce unnecessary interventions                                | Zambia: Did the birth preparedness plan include a discussion about: Who will be there to help you during birth?                                                                                                                                                                         |

### Supplementary Material 3. Receipt of care components, by country

#### Democratic Republic of Congo

|                                               |                                  |              | Available routine ANC components |            |            |         |            |                       |                  |                              | Available country-specific ANC components |                 |                     |                              | ALL AVAILABLE    |                              |
|-----------------------------------------------|----------------------------------|--------------|----------------------------------|------------|------------|---------|------------|-----------------------|------------------|------------------------------|-------------------------------------------|-----------------|---------------------|------------------------------|------------------|------------------------------|
| Intensity and timing of antenatal care visits |                                  | n (weighted) | Blood pressure                   | Urine test | Blood test | Tetanus | Iron suppl | Info on complications | % received all 6 | Mean number received (max 6) | Maternal weight                           | Maternal height | Malaria prophylaxis | Mean number received (max 3) | % received all 9 | Mean number received (max 9) |
| Number of visits                              | 1+ (=any ANC)                    | 8,471        | 74.2%                            | 52.0%      | 61.5%      | 70.9%   | 64.4%      | 62.3%                 | 21.8%            | 3.9                          | 88.4%                                     | 52.2%           | 51.9%               | 2.0                          | 14.0%            | 5.8                          |
|                                               | 1-3                              | 3,985        | 68.1%                            | 43.3%      | 53.6%      | 66.7%   | 59.0%      | 56.2%                 | 16.2%            | 3.5                          | 86.1%                                     | 48.6%           | 45.0%               | 1.8                          | 10.1%            | 5.3                          |
|                                               | 4+                               | 4,485        | 79.6%                            | 59.7%      | 68.5%      | 74.5%   | 69.2%      | 67.7%                 | 26.9%            | 4.2                          | 90.4%                                     | 55.5%           | 58.1%               | 2.0                          | 17.5%            | 6.2                          |
|                                               | 4-7                              | 4,243        | 79.6%                            | 60.2%      | 69.0%      | 74.2%   | 69.7%      | 67.7%                 | 27.3%            | 4.2                          | 90.7%                                     | 56.3%           | 59.1%               | 2.1                          | 17.9%            | 6.3                          |
|                                               | 8+                               | 241          | 81.0%                            | 52.0%      | 60.4%      | 80.1%   | 60.1%      | 68.7%                 | 20.1%            | 4.0                          | 85.8%                                     | 41.8%           | 39.7%               | 1.7                          | 9.7%             | 5.7                          |
| Timing                                        | First visit in 1st trimester     | 6,894        | 80.7%                            | 60.9%      | 67.7%      | 73.9%   | 67.4%      | 67.8%                 | 28.0%            | 4.2                          | 89.8%                                     | 57.4%           | 58.3%               | 2.1                          | 18.9%            | 6.2                          |
|                                               | First visit in 2nd/3rd trimester | 1,576        | 72.7%                            | 49.9%      | 60.1%      | 70.2%   | 63.7%      | 61.0%                 | 20.4%            | 3.8                          | 88.0%                                     | 51.1%           | 50.5%               | 1.9                          | 12.9%            | 5.7                          |
| Visits and timing                             | <4 visits; 1st trimester         | 317          | 75.6%                            | 44.6%      | 52.5%      | 66.4%   | 57.3%      | 60.9%                 | 14.1%            | 3.6                          | 85.6%                                     | 53.8%           | 46.2%               | 1.9                          | 9.0%             | 5.4                          |
|                                               | <4 visits; 2nd/3rd trimester     | 3,668        | 67.5%                            | 43.2%      | 53.7%      | 66.8%   | 59.2%      | 55.8%                 | 16.3%            | 3.5                          | 86.1%                                     | 48.1%           | 44.9%               | 1.8                          | 10.2%            | 5.3                          |
|                                               | 4+ visits; 1st trimester         | 1,259        | 82.0%                            | 65.0%      | 71.5%      | 75.8%   | 69.9%      | 69.6%                 | 31.5%            | 4.3                          | 90.8%                                     | 58.3%           | 61.3%               | 2.1                          | 21.4%            | 6.4                          |
|                                               | 4+ visits; 2nd/3rd trimester     | 3,226        | 78.7%                            | 57.7%      | 67.4%      | 74.0%   | 68.9%      | 67.0%                 | 25.0%            | 4.1                          | 90.2%                                     | 54.4%           | 56.8%               | 2.0                          | 16.0%            | 6.2                          |
|                                               | 8+ visits; 1st trimester         | 103          | 81.0%                            | 62.6%      | 75.5%      | 80.9%   | 74.5%      | 68.0%                 | 29.8%            | 4.4                          | 86.0%                                     | 52.6%           | 56.0%               | 2.0                          | 19.5%            | 6.4                          |
| 8+ visits; 2nd/3rd trimester                  | 138                              | 81.1%        | 44.0%                            | 49.1%      | 79.6%      | 49.4%   | 69.3%      | 12.8%                 | 3.7              | 85.7%                        | 33.7%                                     | 27.4%           | 1.5                 | 2.4%                         | 5.2              |                              |

#### Nigeria

|                                               |                                  |              | Available routine ANC components |            |            |         |            |                       |                  |                              | Available country-specific ANC components |                     |                              | ALL AVAILABLE    |                              |
|-----------------------------------------------|----------------------------------|--------------|----------------------------------|------------|------------|---------|------------|-----------------------|------------------|------------------------------|-------------------------------------------|---------------------|------------------------------|------------------|------------------------------|
| Intensity and timing of antenatal care visits |                                  | n (weighted) | Blood pressure                   | Urine test | Blood test | Tetanus | Iron suppl | Info on complications | % received all 6 | Mean number received (max 6) | Parasites                                 | Malaria prophylaxis | Mean number received (max 2) | % received all 8 | Mean number received (max 8) |
| Number of visits                              | 1+ (=any ANC)                    | 10,717       | 90.8%                            | 81.4%      | 81.6%      | 77.6%   | 90.9%      | 67.2%                 | 45.9%            | 4.9                          | 20.8%                                     | 66.1%               | 0.9                          | 10.3%            | 5.8                          |
|                                               | 1-3                              | 2,112        | 81.3%                            | 68.9%      | 70.2%      | 55.8%   | 84.8%      | 50.7%                 | 23.9%            | 4.1                          | 17.5%                                     | 57.6%               | 0.8                          | 6.7%             | 4.9                          |
|                                               | 4+                               | 8,604        | 93.1%                            | 84.5%      | 84.3%      | 82.9%   | 92.4%      | 71.2%                 | 51.3%            | 5.1                          | 21.6%                                     | 68.2%               | 0.9                          | 11.3%            | 6.0                          |
|                                               | 4-7                              | 4,607        | 90.5%                            | 80.9%      | 80.7%      | 79.8%   | 92.2%      | 63.0%                 | 42.2%            | 4.9                          | 24.3%                                     | 68.3%               | 0.9                          | 12.1%            | 5.8                          |
|                                               | 8+                               | 3,997        | 96.1%                            | 88.6%      | 88.5%      | 86.5%   | 92.5%      | 80.8%                 | 61.8%            | 5.3                          | 18.5%                                     | 68.2%               | 0.9                          | 10.3%            | 6.2                          |
| Timing                                        | First visit in 1st trimester     | 7,875        | 93.7%                            | 85.9%      | 84.6%      | 82.0%   | 92.0%      | 72.3%                 | 51.7%            | 5.1                          | 21.7%                                     | 67.6%               | 0.9                          | 10.3%            | 6.0                          |
|                                               | First visit in 2nd/3rd trimester | 2,841        | 89.7%                            | 79.8%      | 80.4%      | 76.0%   | 90.5%      | 65.4%                 | 43.8%            | 4.8                          | 20.5%                                     | 65.6%               | 0.9                          | 10.4%            | 5.7                          |
| Visits and timing                             | <4 visits; 1st trimester         | 208          | 81.5%                            | 68.1%      | 63.5%      | 52.7%   | 84.7%      | 43.2%                 | 18.8%            | 3.9                          | 15.5%                                     | 47.4%               | 0.6                          | 3.7%             | 4.6                          |
|                                               | <4 visits; 2nd/3rd trimester     | 1,904        | 81.3%                            | 68.9%      | 70.9%      | 56.1%   | 84.8%      | 51.5%                 | 24.4%            | 4.1                          | 17.7%                                     | 58.7%               | 0.8                          | 7.0%             | 4.9                          |
|                                               | 4+ visits; 1st trimester         | 2,633        | 94.7%                            | 87.3%      | 86.3%      | 84.3%   | 92.6%      | 74.6%                 | 54.3%            | 5.2                          | 22.2%                                     | 69.2%               | 0.9                          | 10.9%            | 6.1                          |
|                                               | 4+ visits; 2nd/3rd trimester     | 5,971        | 92.4%                            | 83.3%      | 83.5%      | 82.3%   | 92.3%      | 69.8%                 | 50.0%            | 5.0                          | 21.4%                                     | 67.8%               | 0.9                          | 11.4%            | 5.9                          |
|                                               | 8+ visits; 1st trimester         | 1,642        | 96.6%                            | 90.0%      | 89.4%      | 86.5%   | 92.7%      | 81.6%                 | 62.3%            | 5.4                          | 20.7%                                     | 70.6%               | 0.9                          | 11.5%            | 6.3                          |
| 8+ visits; 2nd/3rd trimester                  | 2,354                            | 95.7%        | 87.7%                            | 87.9%      | 86.5%      | 92.4%   | 80.2%      | 61.5%                 | 5.3              | 17.0%                        | 66.5%                                     | 0.8                 | 90.5%                        | 6.1              |                              |

## Rwanda

|                                               |                                  | Available routine ANC components |                |            |            |         |            |                       |                  |                              | Available country-specific ANC components |                     |                              | ALL AVAILABLE    |                              |
|-----------------------------------------------|----------------------------------|----------------------------------|----------------|------------|------------|---------|------------|-----------------------|------------------|------------------------------|-------------------------------------------|---------------------|------------------------------|------------------|------------------------------|
| Intensity and timing of antenatal care visits |                                  | n (weighted)                     | Blood pressure | Urine test | Blood test | Tetanus | Iron suppl | Info on complications | % received all 6 | Mean number received (max 6) | Parasites                                 | Malaria prophylaxis | Mean number received (max 2) | % received all 8 | Mean number received (max 8) |
| Number of visits                              | 1+ (=any ANC)                    | 4,569                            | 84.1%          | 59.6%      | 96.9%      | 83.0%   | 79.5%      | 78.7%                 | 34.6%            | 4.8                          | 50.9%                                     | 10.9%               | 0.6                          | 1.9%             | 5.4                          |
|                                               | 1-3                              | 2,521                            | 81.8%          | 53.4%      | 96.1%      | 81.5%   | 76.7%      | 75.9%                 | 29.7%            | 4.7                          | 47.6%                                     | 10.3%               | 0.6                          | 1.6%             | 5.2                          |
|                                               | 4+                               | 2,047                            | 87.0%          | 67.2%      | 97.9%      | 84.7%   | 82.9%      | 82.3%                 | 40.7%            | 5.0                          | 54.9%                                     | 11.7%               | 0.7                          | 2.3%             | 5.7                          |
|                                               | 4-7                              | 2,045                            | 87.0%          | 67.2%      | 97.9%      | 84.7%   | 82.9%      | 82.3%                 | 40.7%            | 5.0                          | 55.0%                                     | 11.7%               | 0.7                          | 2.3%             | 5.7                          |
|                                               | 8+                               | 2                                | .              | .          | .          | .       | .          | .                     | .                | .                            | .                                         | .                   | .                            | .                | .                            |
| Timing                                        | First visit in 1st trimester     | 1,986                            | 85.5%          | 64.5%      | 97.8%      | 83.8%   | 81.9%      | 80.7%                 | 38.1%            | 4.9                          | 54.2%                                     | 12.1%               | 0.7                          | 2.3%             | 5.6                          |
|                                               | First visit in 2nd/3rd trimester | 2,582                            | 82.3%          | 53.3%      | 95.7%      | 81.9%   | 76.2%      | 76.2%                 | 30.2%            | 4.7                          | 46.6%                                     | 9.5%                | 0.6                          | 1.4%             | 5.2                          |
| Visits and timing                             | <4 visits; 1st trimester         | 820                              | 82.7%          | 57.7%      | 97.4%      | 81.5%   | 78.1%      | 77.0%                 | 31.1%            | 4.7                          | 50.2%                                     | 12.0%               | 0.6                          | 2.1%             | 5.4                          |
|                                               | <4 visits; 2nd/3rd trimester     | 1,701                            | 81.4%          | 51.4%      | 95.4%      | 81.5%   | 76.0%      | 75.4%                 | 29.0%            | 4.6                          | 46.4%                                     | 9.5%                | 0.6                          | 1.3%             | 5.2                          |
|                                               | 4+ visits; 1st trimester         | 1,762                            | 86.9%          | 67.6%      | 98.0%      | 84.9%   | 83.7%      | 82.4%                 | 41.3%            | 5.0                          | 56.1%                                     | 12.1%               | 0.7                          | 2.5%             | 5.7                          |
|                                               | 4+ visits; 2nd/3rd trimester     | 285                              | 87.7%          | 64.8%      | 97.3%      | 83.8%   | 77.8%      | 81.3%                 | 37.0%            | 4.9                          | 47.9%                                     | 9.3%                | 0.6                          | 1.7%             | 5.5                          |
|                                               | 8+ visits; 1st trimester         | 2                                | .              | .          | *          | *       | *          | *                     | *                | *                            | *                                         | *                   | *                            | *                | *                            |
| 8+ visits; 2nd/3rd trimester                  | 0                                | .                                | .              | *          | *          | *       | *          | *                     | *                | *                            | *                                         | *                   | *                            | *                | *                            |

\* Not estimated due to insufficient sample size.

## Zambia

|                                               |                                  | Available routine ANC components |                |            |            |         |            |                       |                  |                              | Available country-specific ANC components |           |                            |                    |                        |                            |                     | ALL AVAILABLE       |                              |                   |                               |   |
|-----------------------------------------------|----------------------------------|----------------------------------|----------------|------------|------------|---------|------------|-----------------------|------------------|------------------------------|-------------------------------------------|-----------|----------------------------|--------------------|------------------------|----------------------------|---------------------|---------------------|------------------------------|-------------------|-------------------------------|---|
| Intensity and timing of antenatal care visits |                                  | n (weighted)                     | Blood pressure | Urine test | Blood test | Tetanus | Iron suppl | Info on complications | % received all 6 | Mean number received (max 6) | Maternal weight                           | Parasites | HIV counseling and testing | Birth Preparedness | Birth plan (delivered) | Birth plan (complications) | Birth plan (assist) | Malaria prophylaxis | Mean number received (max 8) | % received all 14 | Mean number received (max 14) |   |
| Number of visits                              | 1+ (=any ANC)                    | 7,062                            | 88.0%          | 40.0%      | 94.1%      | 82.5%   | 96.7%      | 88.0%                 | 30.8%            | 4.9                          | 95.3%                                     | 65.6%     | 93.1%                      | 91.3%              | 90.4%                  | 88.5%                      | 87.9%               | 94.5%               | 7.1                          | 22.2%             | 12.0                          |   |
|                                               | 1-3                              | 3,144                            | 86.1%          | 35.2%      | 93.5%      | 80.7%   | 96.0%      | 86.2%                 | 27.2%            | 4.8                          | 94.5%                                     | 62.9%     | 92.7%                      | 90.3%              | 89.2%                  | 86.9%                      | 86.2%               | 93.2%               | 7.0                          | 19.1%             | 11.7                          |   |
|                                               | 4+                               | 3,917                            | 89.6%          | 43.9%      | 94.6%      | 83.9%   | 97.3%      | 89.4%                 | 33.7%            | 5.0                          | 96.0%                                     | 67.8%     | 93.5%                      | 92.2%              | 91.4%                  | 89.8%                      | 89.2%               | 95.5%               | 7.2                          | 24.6%             | 12.1                          |   |
|                                               | 4-7                              | 3,842                            | 89.5%          | 43.4%      | 94.6%      | 83.9%   | 97.2%      | 89.4%                 | 33.3%            | 5.0                          | 96.0%                                     | 67.8%     | 93.4%                      | 92.2%              | 91.4%                  | 89.8%                      | 89.2%               | 95.6%               | 7.2                          | 24.3%             | 12.1                          |   |
|                                               | 8+                               | 75                               | 92.8%          | 68.4%      | 96.0%      | 85.1%   | 100.0%     | 88.2%                 | 54.6%            | 5.3                          | 94.1%                                     | 66.1%     | 94.9%                      | 93.3%              | 91.6%                  | 89.3%                      | 90.7%               | 90.3%               | 7.1                          | 40.3%             | 12.4                          |   |
| Timing                                        | First visit in 1st trimester     | 5,305                            | 89.8%          | 45.0%      | 94.7%      | 83.6%   | 97.1%      | 88.6%                 | 35.4%            | 5.0                          | 96.0%                                     | 66.0%     | 93.5%                      | 90.8%              | 89.8%                  | 88.3%                      | 83.3%               | 94.4%               | 7.1                          | 26.4%             | 12.1                          |   |
|                                               | First visit in 2nd/3rd trimester | 1,755                            | 87.5%          | 38.3%      | 93.9%      | 82.1%   | 96.6%      | 87.9%                 | 29.3%            | 4.9                          | 95.1%                                     | 65.5%     | 93.0%                      | 91.5%              | 90.6%                  | 88.6%                      | 87.8%               | 94.5%               | 7.1                          | 20.8%             | 11.9                          |   |
| Visits and timing                             | <4 visits; 1st trimester         | 352                              | 86.5%          | 37.7%      | 95.4%      | 82.1%   | 95.9%      | 86.5%                 | 28.5%            | 4.8                          | 94.2%                                     | 62.9%     | 92.7%                      | 84.6%              | 82.4%                  | 81.8%                      | 82.2%               | 91.8%               | 6.7                          | 20.6%             | 11.6                          |   |
|                                               | <4 visits; 2nd/3rd trimester     | 2,791                            | 86.1%          | 34.9%      | 93.3%      | 80.6%   | 96.0%      | 86.2%                 | 27.1%            | 4.8                          | 94.5%                                     | 62.9%     | 92.7%                      | 91.0%              | 90.1%                  | 87.5%                      | 86.8%               | 93.3%               | 7.0                          | 18.9%             | 11.8                          |   |
|                                               | 4+ visits; 1st trimester         | 1,403                            | 90.7%          | 46.9%      | 94.6%      | 84.0%   | 97.4%      | 89.2%                 | 37.2%            | 5.0                          | 96.4%                                     | 66.8%     | 93.8%                      | 92.3%              | 91.7%                  | 89.9%                      | 89.8%               | 95.1%               | 7.2                          | 27.8%             | 12.2                          |   |
|                                               | 4+ visits; 2nd/3rd trimester     | 2,514                            | 89.0%          | 42.2%      | 94.6%      | 83.9%   | 97.2%      | 89.6%                 | 31.8%            | 5.0                          | 95.7%                                     | 68.3%     | 93.3%                      | 92.2%              | 91.2%                  | 89.7%                      | 88.9%               | 95.8%               | 7.2                          | 22.8%             | 12.1                          |   |
|                                               | 8+ visits; 1st trimester         | 61                               | 95.8%          | 73.6%      | 95.1%      | 82.1%   | 100.0%     | 88.6%                 | 57.0%            | 5.4                          | 94.5%                                     | 64.7%     | 96.8%                      | 93.5%              | 91.3%                  | 89.8%                      | 89.3%               | 93.5%               | 7.1                          | 41.7%             | 12.5                          |   |
| 8+ visits; 2nd/3rd trimester                  | 14                               | .                                | .              | *          | *          | *       | *          | *                     | *                | *                            | *                                         | *         | *                          | *                  | *                      | *                          | *                   | *                   | *                            | *                 | *                             | * |

\* Not estimated due to insufficient sample size.

## Egypt

|                                               |                                  |              | Available routine ANC components |            |            |         |            |                       |                  |                              | Available country-specific ANC components |                              | ALL AVAILABLE    |                              |
|-----------------------------------------------|----------------------------------|--------------|----------------------------------|------------|------------|---------|------------|-----------------------|------------------|------------------------------|-------------------------------------------|------------------------------|------------------|------------------------------|
| Intensity and timing of antenatal care visits |                                  | n (weighted) | Blood pressure                   | Urine test | Blood test | Tetanus | Iron suppl | Info on complications | % received all 6 | Mean number received (max 6) | Maternal weight                           | Mean number received (max 1) | % received all 7 | Mean number received (max 7) |
| Number of visits                              | 1+ (=any ANC)                    | 7,836        | 93.3%                            | 78.1%      | 80.9%      | 76.2%   | 71.0%      | 46.4%                 | 24.8%            | 4.5                          | 87.7%                                     | 0.9                          | 24.1%            | 5.3                          |
|                                               | 1-3                              | 617          | 83.1%                            | 59.5%      | 62.4%      | 74.1%   | 54.8%      | 29.7%                 | 10.3%            | 3.6                          | 76.1%                                     | 0.8                          | 10.1%            | 4.4                          |
|                                               | 4+                               | 7,218        | 94.2%                            | 79.7%      | 82.5%      | 76.4%   | 72.4%      | 47.8%                 | 26.0%            | 4.5                          | 88.6%                                     | 0.9                          | 25.3%            | 5.4                          |
|                                               | 4-7                              | 2,178        | 90.8%                            | 71.5%      | 74.1%      | 78.2%   | 66.9%      | 37.1%                 | 17.4%            | 4.2                          | 84.2%                                     | 0.8                          | 16.9%            | 5.0                          |
|                                               | 8+                               | 5,039        | 95.6%                            | 83.3%      | 86.1%      | 75.6%   | 74.7%      | 52.4%                 | 29.8%            | 4.7                          | 90.6%                                     | 0.9                          | 29.0%            | 5.6                          |
| Timing                                        | First visit in 1st trimester     | 1,276        | 94.1%                            | 80.3%      | 82.9%      | 75.8%   | 72.4%      | 49.5%                 | 27.0%            | 4.6                          | 88.5%                                     | 0.9                          | 26.3%            | 5.4                          |
|                                               | First visit in 2nd/3rd trimester | 6,558        | 89.3%                            | 67.2%      | 70.7%      | 78.4%   | 63.7%      | 30.6%                 | 13.3%            | 4.0                          | 83.2%                                     | 0.8                          | 12.7%            | 4.8                          |
| Visits and timing                             | <4 visits; 1st trimester         | 251          | 84.3%                            | 62.4%      | 65.5%      | 76.5%   | 52.2%      | 38.0%                 | 12.4%            | 3.8                          | 75.9%                                     | 0.8                          | 12.0%            | 4.5                          |
|                                               | <4 visits; 2nd/3rd trimester     | 365          | 82.3%                            | 57.6%      | 60.4%      | 72.4%   | 56.6%      | 24.1%                 | 8.8%             | 3.5                          | 76.3%                                     | 0.8                          | 8.8%             | 4.3                          |
|                                               | 4+ visits; 1st trimester         | 6,307        | 94.5%                            | 81.0%      | 83.6%      | 75.8%   | 73.2%      | 49.9%                 | 27.6%            | 4.6                          | 89.0%                                     | 0.9                          | 26.9%            | 4.5                          |
|                                               | 4+ visits; 2nd/3rd trimester     | 911          | 92.2%                            | 71.1%      | 74.8%      | 80.8%   | 66.5%      | 33.1%                 | 15.1%            | 4.2                          | 86.0%                                     | 0.9                          | 14.3%            | 5.0                          |
|                                               | 8+ visits; 1st trimester         | 4,744        | 95.6%                            | 83.7%      | 86.3%      | 75.3%   | 75.2%      | 53.2%                 | 30.5%            | 4.7                          | 90.8%                                     | 0.9                          | 29.6%            | 5.6                          |
|                                               | 8+ visits; 2nd/3rd trimester     | 295          | 95.3%                            | 77.7%      | 83.7%      | 80.9%   | 66.3%      | 41.0%                 | 18.9%            | 4.5                          | 87.2%                                     | 0.9                          | 18.3%            | 5.3                          |

## Jordan

|                                               |                                  |              | Available routine ANC components |            |            |         |            |                       |                  |                              | Available country-specific ANC components |                       |                         |                              | ALL AVAILABLE    |                              |
|-----------------------------------------------|----------------------------------|--------------|----------------------------------|------------|------------|---------|------------|-----------------------|------------------|------------------------------|-------------------------------------------|-----------------------|-------------------------|------------------------------|------------------|------------------------------|
| Intensity and timing of antenatal care visits |                                  | n (weighted) | Blood pressure                   | Urine test | Blood test | Tetanus | Iron suppl | Info on complications | % received all 6 | Mean number received (max 6) | Maternal weight                           | Postnatal information | Postnatal complications | Mean number received (max 3) | % received all 9 | Mean number received (max 9) |
| Number of visits                              | 1+ (=any ANC)                    | 4,885        | 98.0%                            | 95.3%      | 95.6%      | 31.5%   | 86.5%      | 34.4%                 | 9.9%             | 4.4                          | 96.8%                                     | 73.6%                 | 28.9%                   | 2.0                          | 6.0%             | 6.4                          |
|                                               | 1-3                              | 238          | 85.7%                            | 69.6%      | 70.0%      | 23.5%   | 64.9%      | 30.1%                 | 4.3%             | 3.4                          | 80.4%                                     | 58.2%                 | 32.4%                   | 1.7                          | 2.5%             | 5.2                          |
|                                               | 4+                               | 4,646        | 98.6%                            | 96.6%      | 96.9%      | 31.9%   | 87.9%      | 34.6%                 | 10.2%            | 4.5                          | 97.7%                                     | 74.4%                 | 28.8%                   | 2.0                          | 6.2%             | 6.5                          |
|                                               | 4-7                              | 1,255        | 97.5%                            | 95.0%      | 95.9%      | 32.1%   | 85.5%      | 32.6%                 | 8.6%             | 4.4                          | 96.8%                                     | 70.7%                 | 28.5%                   | 2.0                          | 4.9%             | 6.3                          |
|                                               | 8+                               | 3,390        | 99.1%                            | 97.2%      | 97.2%      | 31.9%   | 88.4%      | 35.3%                 | 10.8%            | 4.5                          | 98.0%                                     | 75.7%                 | 28.8%                   | 2.0                          | 6.6%             | 6.5                          |
| Timing                                        | First visit in 1st trimester     | 416          | 98.3%                            | 95.7%      | 96.2%      | 31.2%   | 87.3%      | 34.2%                 | 10.1%            | 4.4                          | 97.5%                                     | 73.7%                 | 28.6%                   | 2.0                          | 6.2%             | 6.4                          |
|                                               | First visit in 2nd/3rd trimester | 4,467        | 95.3%                            | 90.2%      | 88.3%      | 34.9%   | 77.5%      | 35.8%                 | 7.9%             | 4.2                          | 90.0%                                     | 72.6%                 | 32.3%                   | 2.0                          | 4.0%             | 6.2                          |
| Visits and timing                             | <4 visits; 1st trimester         | 118          | 84.8%                            | 69.1%      | 69.8%      | 21.2%   | 68.6%      | 26.6%                 | 6.4%             | 3.4                          | 78.7%                                     | 48.1%                 | 29.9%                   | 1.6                          | 4.6%             | 5.0                          |
|                                               | <4 visits; 2nd/3rd trimester     | 120          | 86.5%                            | 70.1%      | 70.2%      | 25.8%   | 61.4%      | 33.5%                 | 2.3%             | 3.5                          | 82.2%                                     | 68.1%                 | 35.0%                   | 1.9                          | 0.4%             | 5.3                          |
|                                               | 4+ visits; 1st trimester         | 4,349        | 98.6%                            | 96.5%      | 97.0%      | 31.5%   | 87.8%      | 34.6%                 | 10.2%            | 4.5                          | 98.0%                                     | 74.4%                 | 28.6%                   | 2.0                          | 6.2%             | 6.5                          |
|                                               | 4+ visits; 2nd/3rd trimester     | 296          | 98.8%                            | 98.4%      | 95.6%      | 38.6%   | 84.1%      | 36.8%                 | 10.2%            | 4.5                          | 93.2%                                     | 74.4%                 | 31.3%                   | 2.0                          | 5.5%             | 6.5                          |
|                                               | 8+ visits; 1st trimester         | 3,311        | 99.1%                            | 97.1%      | 97.2%      | 31.9%   | 88.4%      | 35.3%                 | 10.9%            | 4.5                          | 98.3%                                     | 75.7%                 | 28.9%                   | 2.0                          | 6.7%             | 6.5                          |
|                                               | 8+ visits; 2nd/3rd trimester     | 79           | 99.6%                            | 98.5%      | 98.5%      | 32.2%   | 86.6%      | 35.8%                 | 6.2%             | 4.5                          | 84.3%                                     | 75.7%                 | 28.1%                   | 1.9                          | 2.9%             | 6.4                          |

## Indonesia

|                                               |                                  | Available routine ANC components |                |            |            |         |            |                       |                  |                              | Available country-specific ANC components |                   |                         |                     |                  |             |                 | ALL AVAILABLE                |                   |                               |
|-----------------------------------------------|----------------------------------|----------------------------------|----------------|------------|------------|---------|------------|-----------------------|------------------|------------------------------|-------------------------------------------|-------------------|-------------------------|---------------------|------------------|-------------|-----------------|------------------------------|-------------------|-------------------------------|
| Intensity and timing of antenatal care visits |                                  | n (weighted)                     | Blood pressure | Urine test | Blood test | Tetanus | Iron suppl | Info on complications | % received all 6 | Mean number received (max 6) | Maternal weight                           | Delivery location | Delivery transportation | Delivery assistance | Delivery payment | Blood donor | Maternal height | Mean number received (max 7) | % received all 13 | Mean number received (max 13) |
| Number of visits                              | 1+ (=any ANC)                    | 9,586                            | 96.1%          | 47.4%      | 42.0%      | 62.3%   | 77.7%      | 53.8%                 | 12.0%            | 3.8                          | 95.2%                                     | 83.1%             | 62.6%                   | 82.2%               | 79.4%            | 16.6%       | 47.3%           | 4.7                          | 3.3%              | 8.5                           |
|                                               | 1-3                              | 872                              | 83.9%          | 21.1%      | 23.8%      | 36.4%   | 57.0%      | 30.3%                 | 1.1%             | 2.5                          | 77.6%                                     | 62.7%             | 37.3%                   | 65.2%               | 61.2%            | 6.1%        | 27.1%           | 3.4                          | 0.1%              | 5.9                           |
|                                               | 4+                               | 8,714                            | 97.3%          | 50.0%      | 43.9%      | 64.9%   | 79.8%      | 56.1%                 | 13.0%            | 3.9                          | 97.0%                                     | 85.1%             | 65.1%                   | 83.9%               | 81.2%            | 17.7%       | 49.3%           | 4.8                          | 3.6%              | 8.7                           |
|                                               | 4-7                              | 3,010                            | 96.3%          | 40.1%      | 40.5%      | 62.3%   | 74.4%      | 50.1%                 | 8.5%             | 3.6                          | 95.0%                                     | 80.3%             | 56.9%                   | 79.2%               | 77.5%            | 12.5%       | 44.5%           | 4.5                          | 1.9%              | 8.1                           |
|                                               | 8+                               | 5,703                            | 97.9%          | 55.2%      | 45.7%      | 66.3%   | 82.6%      | 59.3%                 | 15.5%            | 4.1                          | 98.0%                                     | 87.7%             | 69.4%                   | 86.4%               | 83.2%            | 20.4%       | 51.9%           | 5.0                          | 4.5%              | 9.0                           |
| Timing                                        | First visit in 1st trimester     | 1,676                            | 97.0%          | 51.6%      | 43.9%      | 63.8%   | 79.8%      | 56.3%                 | 13.3%            | 3.9                          | 96.8%                                     | 85.1%             | 65.0%                   | 83.9%               | 80.9%            | 18.1%       | 48.9%           | 4.8                          | 3.7%              | 8.7                           |
|                                               | First visit in 2nd/3rd trimester | 7,908                            | 91.8%          | 27.5%      | 33.0%      | 55.5%   | 67.9%      | 41.6%                 | 5.5%             | 3.2                          | 87.9%                                     | 73.6%             | 50.8%                   | 74.3%               | 72.3%            | 10.0%       | 40.0%           | 4.1                          | 1.1%              | 7.3                           |
| Visits and timing                             | <4 visits; 1st trimester         | 342                              | 96.0%          | 28.5%      | 22.4%      | 34.9%   | 59.0%      | 34.1%                 | 1.1%             | 2.7                          | 80.1%                                     | 65.7%             | 36.3%                   | 67.3%               | 64.7%            | 6.6%        | 21.7%           | 3.4                          | 100.0%            | 6.1                           |
|                                               | <4 visits; 2nd/3rd trimester     | 529                              | 85.7%          | 16.4%      | 24.0%      | 37.3%   | 55.7%      | 27.9%                 | 1.1%             | 2.4                          | 75.9%                                     | 60.8%             | 37.9%                   | 63.8%               | 58.9%            | 5.8%        | 30.7%           | 3.3                          | 0.2%              | 5.8                           |
|                                               | 4+ visits; 1st trimester         | 7,566                            | 97.2%          | 52.6%      | 44.9%      | 65.1%   | 80.7%      | 57.3%                 | 13.9%            | 4.0                          | 97.5%                                     | 86.0%             | 66.3%                   | 84.7%               | 81.6%            | 18.6%       | 50.1%           | 4.9                          | 3.9%              | 8.8                           |
|                                               | 4+ visits; 2nd/3rd trimester     | 1,147                            | 97.5%          | 32.6%      | 37.2%      | 63.8%   | 73.5%      | 48.0%                 | 7.5%             | 3.5                          | 93.4%                                     | 79.6%             | 56.7%                   | 79.1%               | 78.5%            | 11.9%       | 44.3%           | 4.4                          | 1.6%              | 7.9                           |
|                                               | 8+ visits; 1st trimester         | 5,517                            | 97.9%          | 55.6%      | 45.7%      | 66.5%   | 82.8%      | 59.3%                 | 15.5%            | 4.1                          | 98.1%                                     | 87.8%             | 69.6%                   | 86.5%               | 83.0%            | 20.5%       | 52.1%           | 5.0                          | 4.6%              | 9.1                           |
|                                               | 8+ visits; 2nd/3rd trimester     | 168                              | 97.2%          | 43.0%      | 46.0%      | 60.8%   | 76.8%      | 59.5%                 | 14.0%            | 3.8                          | 96.8%                                     | 83.4%             | 65.8%                   | 85.4%               | 87.9%            | 17.5%       | 45.8%           | 4.8                          | 3.0%              | 8.7                           |

## Nepal

|                                               |                                  | Available routine ANC components |                |            |            |         |            |                       |                  |                              | Available country-specific ANC components |           |                              | ALL AVAILABLE    |                              |
|-----------------------------------------------|----------------------------------|----------------------------------|----------------|------------|------------|---------|------------|-----------------------|------------------|------------------------------|-------------------------------------------|-----------|------------------------------|------------------|------------------------------|
| Intensity and timing of antenatal care visits |                                  | n (weighted)                     | Blood pressure | Urine test | Blood test | Tetanus | Iron suppl | Info on complications | % received all 6 | Mean number received (max 6) | Advised to use SBA                        | Parasites | Mean number received (max 2) | % received all 8 | Mean number received (max 8) |
| Number of visits                              | 1+ (=any ANC)                    | 25,000                           | 86.9%          | 56.6%      | 46.5%      | 91.6%   | 92.7%      | 75.6%                 | 35.2%            | 4.5                          | 73.8%                                     | 66.5%     | 1.4                          | 24.2%            | 5.9                          |
|                                               | 1-3                              | 995                              | 75.8%          | 36.1%      | 25.9%      | 84.1%   | 85.0%      | 58.9%                 | 14.1%            | 3.7                          | 57.7%                                     | 52.4%     | 1.1                          | 8.1%             | 4.8                          |
|                                               | 4+                               | 1,505                            | 94.2%          | 70.1%      | 60.1%      | 96.6%   | 97.8%      | 86.7%                 | 49.2%            | 5.1                          | 84.4%                                     | 75.8%     | 1.6                          | 34.8%            | 6.7                          |
|                                               | 4-7                              | 1,304                            | 93.8%          | 66.8%      | 56.5%      | 96.4%   | 98.5%      | 86.8%                 | 46.7%            | 5.0                          | 84.2%                                     | 78.2%     | 1.6                          | 34.2%            | 6.6                          |
|                                               | 8+                               | 200                              | 97.4%          | 91.5%      | 83.4%      | 97.9%   | 93.1%      | 86.1%                 | 65.4%            | 5.5                          | 86.0%                                     | 60.4%     | 1.5                          | 39.2%            | 7.0                          |
| Timing                                        | First visit in 1st trimester     | 1,035                            | 92.9%          | 69.9%      | 56.6%      | 93.0%   | 94.4%      | 82.8%                 | 44.7%            | 4.9                          | 78.6%                                     | 69.6%     | 1.5                          | 31.1%            | 6.4                          |
|                                               | First visit in 2nd/3rd trimester | 1,463                            | 78.5%          | 37.8%      | 32.1%      | 89.6%   | 90.2%      | 65.5%                 | 21.9%            | 3.9                          | 67.0%                                     | 62.0%     | 1.3                          | 14.4%            | 5.2                          |
| Visits and timing                             | <4 visits; 1st trimester         | 364                              | 84.3%          | 48.6%      | 29.5%      | 81.3%   | 84.6%      | 65.5%                 | 16.5%            | 3.9                          | 57.3%                                     | 54.8%     | 1.1                          | 8.9%             | 5.1                          |
|                                               | <4 visits; 2nd/3rd trimester     | 630                              | 70.9%          | 28.9%      | 23.8%      | 85.7%   | 85.2%      | 55.0%                 | 12.7%            | 3.5                          | 58.0%                                     | 50.9%     | 1.1                          | 7.7%             | 4.6                          |
|                                               | 4+ visits; 1st trimester         | 1,099                            | 95.7%          | 76.9%      | 65.6%      | 96.9%   | 97.7%      | 88.5%                 | 54.0%            | 5.2                          | 85.7%                                     | 74.6%     | 1.6                          | 38.5%            | 6.8                          |
|                                               | 4+ visits; 2nd/3rd trimester     | 405                              | 90.2%          | 51.7%      | 45.1%      | 95.8%   | 98.0%      | 81.8%                 | 36.1%            | 4.6                          | 81.0%                                     | 79.3%     | 1.6                          | 25.0%            | 6.2                          |
|                                               | 8+ visits; 1st trimester         | 184                              | 97.4%          | 93.6%      | 86.8%      | 97.7%   | 92.4%      | 86.4%                 | 67.1%            | 5.5                          | 84.8%                                     | 58.2%     | 1.4                          | 40.0%            | 7.0                          |
|                                               | 8+ visits; 2nd/3rd trimester     | 16                               | *              | *          | *          | *       | *          | *                     | *                | *                            | *                                         | *         | *                            | *                | *                            |

\* Not estimated due to insufficient sample size.

## Colombia

|                                               |                                  | Available routine ANC components |                |            |            |         |            |                       |                  |                              | Available country-specific ANC components |                  |               |                    |            |                              | ALL AVAILABLE     |                               |
|-----------------------------------------------|----------------------------------|----------------------------------|----------------|------------|------------|---------|------------|-----------------------|------------------|------------------------------|-------------------------------------------|------------------|---------------|--------------------|------------|------------------------------|-------------------|-------------------------------|
| Intensity and timing of antenatal care visits |                                  | n (weighted)                     | Blood pressure | Urine test | Blood test | Tetanus | Iron suppl | Info on complications | % received all 6 | Mean number received (max 6) | Maternal weight                           | Foetal heartrate | Fundal height | Calcium supplement | Folic acid | Mean number received (max 5) | % received all 11 | Mean number received (max 11) |
| Number of visits                              | 1+ (=any ANC)                    | 8,481                            | 99.5%          | 97.4%      | 97.9%      | 60.4%   | 94.8%      | 81.9%                 | 48.1%            | 5.3                          | 99.4%                                     | 97.1%            | 99.1%         | 90.0%              | 93.3%      | 4.8                          | 44.0%             | 10.1                          |
|                                               | 1-3                              | 707                              | 98.3%          | 91.5%      | 92.4%      | 40.7%   | 82.6%      | 65.7%                 | 22.8%            | 4.7                          | 96.1%                                     | 92.0%            | 96.1%         | 77.2%              | 78.5%      | 4.4                          | 18.5%             | 9.1                           |
|                                               | 4+                               | 7,774                            | 99.6%          | 97.9%      | 98.4%      | 62.2%   | 95.9%      | 83.4%                 | 50.4%            | 5.4                          | 99.7%                                     | 97.6%            | 99.3%         | 91.1%              | 94.7%      | 4.8                          | 46.3%             | 10.2                          |
|                                               | 4-7                              | 4,603                            | 99.5%          | 97.4%      | 98.1%      | 59.5%   | 95.6%      | 81.4%                 | 46.9%            | 5.3                          | 99.6%                                     | 96.9%            | 99.2%         | 90.4%              | 93.9%      | 4.8                          | 42.8%             | 10.1                          |
|                                               | 8+                               | 3,171                            | 99.9%          | 98.6%      | 98.9%      | 66.1%   | 96.4%      | 86.1%                 | 55.5%            | 5.5                          | 99.9%                                     | 98.6%            | 99.5%         | 92.2%              | 95.7%      | 4.9                          | 41.3%             | 10.3                          |
| Timing                                        | First visit in 1st trimester     | 1,894                            | 99.7%          | 98.1%      | 98.6%      | 63.0%   | 95.9%      | 83.9%                 | 51.5%            | 5.4                          | 99.7%                                     | 97.7%            | 99.3%         | 91.1%              | 94.6%      | 4.8                          | 47.4%             | 10.2                          |
|                                               | First visit in 2nd/3rd trimester | 6,586                            | 99.1%          | 94.9%      | 95.6%      | 51.4%   | 91.3%      | 75.1%                 | 36.2%            | 5.1                          | 98.4%                                     | 95.3%            | 98.2%         | 86.1%              | 89.0%      | 4.7                          | 32.2%             | 9.7                           |
| Visits and timing                             | <4 visits; 1st trimester         | 129                              | 97.3%          | 93.5%      | 96.0%      | 41.5%   | 83.5%      | 63.7%                 | 25.9%            | 4.8                          | 93.8%                                     | 89.6%            | 95.5%         | 78.0%              | 73.8%      | 4.3                          | 19.0%             | 9.1                           |
|                                               | <4 visits; 2nd/3rd trimester     | 577                              | 98.5%          | 91.0%      | 91.6%      | 40.5%   | 82.4%      | 66.2%                 | 22.2%            | 4.7                          | 96.6%                                     | 92.5%            | 96.3%         | 77.0%              | 79.6%      | 4.4                          | 18.4%             | 9.1                           |
|                                               | 4+ visits; 1st trimester         | 6,457                            | 99.7%          | 98.2%      | 98.7%      | 63.4%   | 96.1%      | 84.3%                 | 52.0%            | 5.4                          | 99.8%                                     | 97.8%            | 99.4%         | 91.4%              | 95.0%      | 4.8                          | 47.9%             | 10.2                          |
|                                               | 4+ visits; 2nd/3rd trimester     | 1,317                            | 99.3%          | 96.6%      | 97.3%      | 56.2%   | 95.2%      | 79.0%                 | 42.4%            | 5.2                          | 99.2%                                     | 96.5%            | 99.1%         | 90.1%              | 93.1%      | 4.8                          | 32.2%             | 10.0                          |
|                                               | 8+ visits; 1st trimester         | 3,074                            | 99.9%          | 98.6%      | 98.6%      | 65.7%   | 96.4%      | 86.3%                 | 55.3%            | 5.5                          | 99.9%                                     | 98.6%            | 99.5%         | 93.0%              | 95.8%      | 4.9                          | 51.2%             | 10.3                          |
| 8+ visits; 2nd/3rd trimester                  | 97                               | 99.4%                            | 98.9%          | 98.9%      | 77.2%      | 95.6%   | 82.6%      | 60.5%                 | 5.5              | 99.4%                        | 99.2%                                     | 98.9%            | 89.3%         | 94.7%              | 4.8        | 54.7%                        | 10.3              |                               |

## Haiti

|                                               |                                  | Available routine ANC components |                |            |            |         |            |                       |                  |                              | Available country-specific ANC components |           |                  |               |                              | ALL AVAILABLE     |                               |
|-----------------------------------------------|----------------------------------|----------------------------------|----------------|------------|------------|---------|------------|-----------------------|------------------|------------------------------|-------------------------------------------|-----------|------------------|---------------|------------------------------|-------------------|-------------------------------|
| Intensity and timing of antenatal care visits |                                  | n (weighted)                     | Blood pressure | Urine test | Blood test | Tetanus | Iron suppl | Info on complications | % received all 6 | Mean number received (max 6) | Maternal weight                           | Parasites | Foetal heartrate | Fundal height | Mean number received (max 4) | % received all 10 | Mean number received (max 10) |
| Number of visits                              | 1+ (=any ANC)                    | 3,533                            | 96.8%          | 83.8%      | 84.5%      | 80.1%   | 83.0%      | 65.3%                 | 43.8%            | 4.9                          | 95.5%                                     | 9.6%      | 90.9%            | 83.0%         | 2.8                          | 9.0%              | 7.8                           |
|                                               | 1-3                              | 951                              | 91.9%          | 67.3%      | 66.4%      | 67.5%   | 73.7%      | 52.5%                 | 23.5%            | 4.2                          | 89.9%                                     | 16.2%     | 80.2%            | 66.2%         | 2.5                          | 4.3%              | 6.7                           |
|                                               | 4+                               | 2,582                            | 98.5%          | 89.9%      | 91.1%      | 84.8%   | 86.4%      | 70.0%                 | 52.3%            | 5.2                          | 97.5%                                     | 15.8%     | 94.8%            | 89.1%         | 3.0                          | 10.8%             | 8.2                           |
|                                               | 4-7                              | 1,939                            | 98.7%          | 87.9%      | 89.2%      | 85.0%   | 85.5%      | 68.3%                 | 49.3%            | 5.2                          | 97.2%                                     | 17.5%     | 93.8%            | 88.0%         | 3.0                          | 10.2%             | 8.1                           |
|                                               | 8+                               | 642                              | 98.0%          | 96.1%      | 97.0%      | 84.2%   | 89.1%      | 75.2%                 | 57.2%            | 5.4                          | 98.5%                                     | 12.3%     | 98.0%            | 92.5%         | 3.1                          | 12.5%             | 8.5                           |
| Timing                                        | First visit in 1st trimester     | 1,290                            | 97.7%          | 88.7%      | 88.7%      | 83.3%   | 86.2%      | 67.3%                 | 48.7%            | 5.1                          | 97.1%                                     | 9.4%      | 92.6%            | 86.5%         | 2.9                          | 10.2%             | 8.0                           |
|                                               | First visit in 2nd/3rd trimester | 2,242                            | 95.1%          | 75.4%      | 77.0%      | 74.6%   | 77.4%      | 61.8%                 | 35.2%            | 4.6                          | 92.5%                                     | 15.7%     | 87.8%            | 76.8%         | 2.7                          | 6.9%              | 7.3                           |
| Visits and timing                             | <4 visits; 1st trimester         | 320                              | 91.2%          | 71.7%      | 68.5%      | 68.4%   | 75.8%      | 49.4%                 | 24.3%            | 4.3                          | 96.1%                                     | 15.0%     | 76.6%            | 64.9%         | 2.4                          | 4.7%              | 6.7                           |
|                                               | <4 visits; 2nd/3rd trimester     | 631                              | 92.3%          | 65.1%      | 65.3%      | 67.0%   | 72.6%      | 54.1%                 | 23.1%            | 4.2                          | 88.8%                                     | 10.0%     | 82.0%            | 66.9%         | 2.5                          | 4.1%              | 6.6                           |
|                                               | 4+ visits; 1st trimester         | 1,922                            | 98.8%          | 91.6%      | 92.1%      | 85.8%   | 87.9%      | 70.3%                 | 52.8%            | 5.3                          | 100.0%                                    | 15.9%     | 95.3%            | 90.1%         | 3.0                          | 11.2%             | 8.3                           |
|                                               | 4+ visits; 2nd/3rd trimester     | 659                              | 97.8%          | 85.2%      | 88.2%      | 81.9%   | 81.9%      | 69.2%                 | 46.7%            | 5.0                          | 98.0%                                     | 16.6%     | 93.5%            | 86.3%         | 2.9                          | 9.6%              | 8.0                           |
|                                               | 8+ visits; 1st trimester         | 610                              | 98.1%          | 96.2%      | 96.8%      | 84.4%   | 89.6%      | 74.8%                 | 57.0%            | 5.4                          | 14.4%                                     | 90.9%     | 98.1%            | 92.3%         | 3.1                          | 12.5%             | 8.5                           |
| 8+ visits; 2nd/3rd trimester                  | 31                               | *                                | *              | *          | *          | *       | *          | *                     | *                | *                            | *                                         | *         | *                | *             | *                            | *                 | *                             |

\* Not estimated due to insufficient sample size.
